# Supplementary material for: α-Oxidation of banana lignin with atmospheric oxygen catalyzed by Co3O4
Source: Royal Society of Chemistry journal article supplement (doi:10.1039/d1re00053e), 2021-01-01

## Supplementary Information

# $\alpha$ -oxidation of banana lignin with atmospheric oxygen catalyzed by $\text{Co}_3\text{O}_4$

*Carlos A.C. Kramer*<sup>\*‡</sup>. *Luciene S. de Carvalho*<sup>‡</sup>

<sup>‡</sup> Energy Technology Laboratory. Institute of Chemistry. Federal University of Rio Grande do Norte.  
Natal. Rio Grande do Norte 59075-000. Brazil

**Corresponding author**

\*Email: [carlosaugustokramer@gmail.com](mailto:carlosaugustokramer@gmail.com)

## Contents

---

|                                                                                                                                                   |          |
|---------------------------------------------------------------------------------------------------------------------------------------------------|----------|
| <b>Fig. SI-1</b> TG and DTG curves for thermal analysis of raw biomass .....                                                                      | <b>3</b> |
| <b>Fig. SI-2</b> Corresponding structure of the catalyst obtained - COD ID number 9005897, File available in Supplementary Files (.cif) .....     | <b>3</b> |
| <b>SI-Table a</b> Relative transmittance of the band 3400-3430cm <sup>-1</sup> (axial stretching of the O-H bond) .....                           | <b>4</b> |
| <b>SI-Table b</b> Relative transmittance of the band 1710cm <sup>-1</sup> (axial deformation of double carbon-oxygen bonds of ketones, C=O) ..... | <b>4</b> |

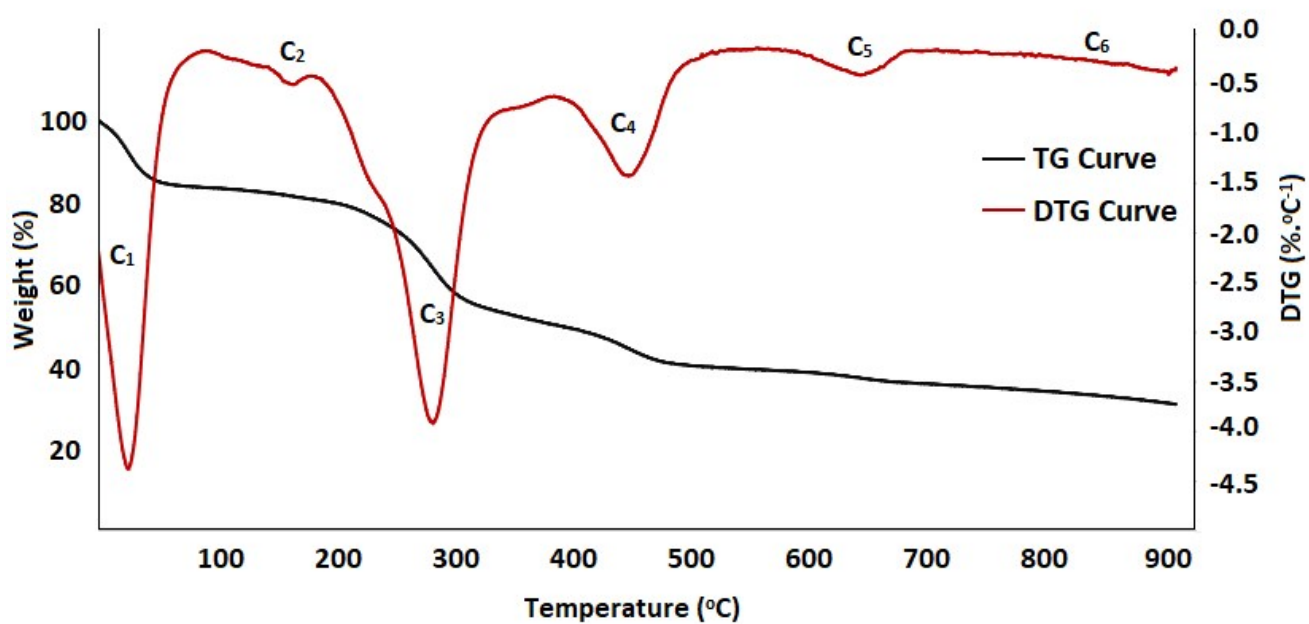

Fig. SI-1 TG and DTG curves for thermal analysis of raw biomass

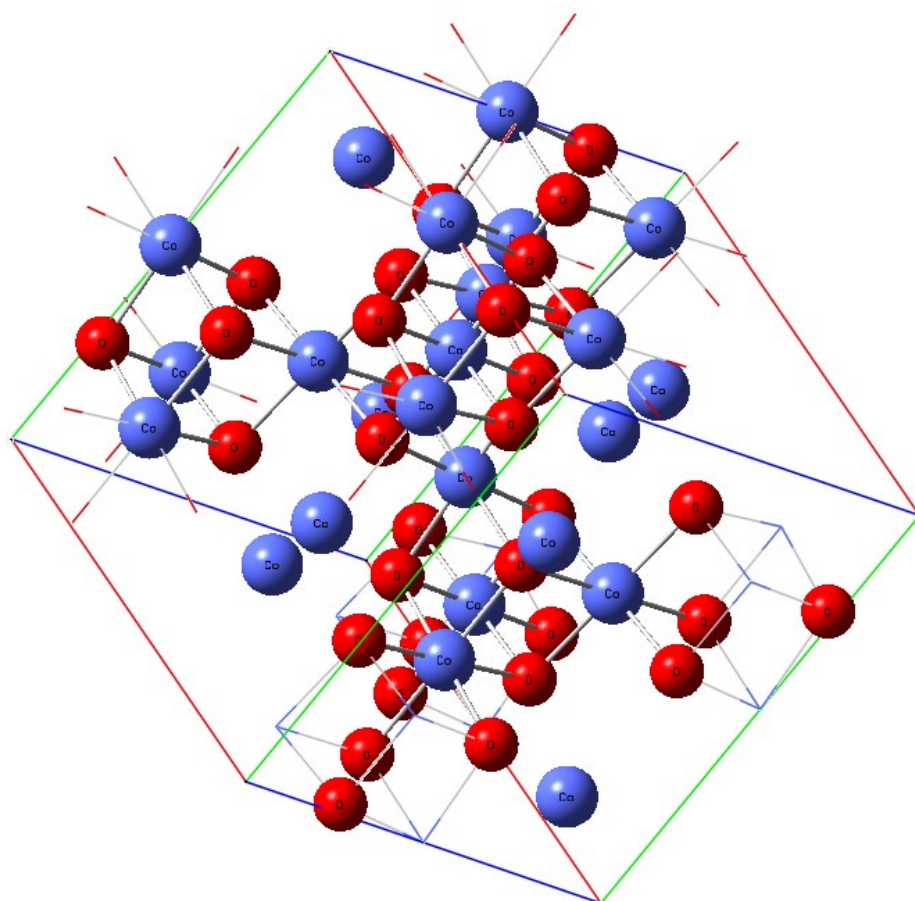

Fig. SI-2 Corresponding structure of the catalyst obtained - COD ID number 9005897, File available in Supplementary Files (.cif)

**SI-Table a** Relative transmittance of the band 3400-3430cm<sup>-1</sup> (axial stretching of the O-H bond)

---

| Time (h) | <i>Co<sub>3</sub>O<sub>4</sub> catalyst concentration (mol/mol)</i> |       |       |       |
|----------|---------------------------------------------------------------------|-------|-------|-------|
|          | 0.0                                                                 | 0.50% | 1.0%  | 2.0%  |
| 0        | 97.68                                                               | 97.68 | 97.68 | 97.68 |
| 6        | 97.73                                                               | 97.69 | 97.63 | 97.65 |
| 12       | 97.83                                                               | 97.7  | 97.77 | 97.68 |
| 18       | 97.76                                                               | 97.65 | 97.74 | 97.69 |
| 24       | 97.82                                                               | 97.62 | 97.64 | 97.61 |
| 30       | 97.79                                                               | 97.7  | 97.51 | 97.54 |
| 36       | 97.76                                                               | 97.65 | 97.55 | 97.52 |
| 42       | 97.84                                                               | 97.58 | 97.52 | 97.51 |
| 48       | 97.68                                                               | 97.55 | 97.42 | 97.50 |
| 54       | 97.73                                                               | 97.57 | 97.39 | 97.40 |
| 60       | 97.75                                                               | 97.52 | 97.42 | 97.42 |
| 66       | 97.71                                                               | 97.55 | 97.36 | 97.38 |
| 72       | 97.69                                                               | 97.51 | 97.38 | 97.39 |

**SI-Table b** Relative transmittance of the band 1710cm<sup>-1</sup> (axial deformation of double carbon-oxygen bonds of ketones, C=O)

---

| Time | <i>Co<sub>3</sub>O<sub>4</sub> catalyst concentration (mol/mol)</i> |       |       |       |
|------|---------------------------------------------------------------------|-------|-------|-------|
|      | 0.0                                                                 | 0.50% | 1.0%  | 2.0%  |
| 0    | 98.84                                                               | 98.84 | 98.84 | 98.84 |
| 6    | 98.83                                                               | 98.72 | 98.76 | 98.74 |
| 12   | 98.84                                                               | 98.69 | 98.51 | 98.5  |
| 18   | 98.82                                                               | 98.58 | 98.43 | 98.44 |
| 24   | 98.81                                                               | 98.51 | 98.38 | 98.36 |
| 30   | 98.79                                                               | 98.43 | 98.18 | 98.22 |
| 36   | 98.76                                                               | 98.38 | 98.08 | 98.14 |
| 42   | 98.76                                                               | 98.28 | 98.01 | 97.98 |
| 48   | 98.77                                                               | 98.10 | 97.84 | 97.86 |
| 54   | 98.76                                                               | 97.91 | 97.64 | 97.59 |
| 60   | 98.74                                                               | 97.85 | 97.66 | 97.60 |
| 66   | 98.75                                                               | 97.84 | 97.67 | 97.59 |
| 72   | 98.74                                                               | 97.83 | 97.66 | 97.60 |

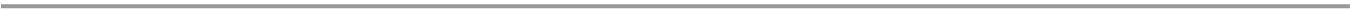

Supplement: d1re00053e1.pdf [file d1re00053e1.pdf]
